# Supplementary material for: Hegemonic masculinity predicts 2016 and 2020 voting and candidate evaluations
Source: PubMed Central journal article supplement — Proc Natl Acad Sci U S A. 2021 Jan 4;118(2):e2020589118. doi: 10.1073/pnas.2020589118 (PMC7812802; doi:10.1073/pnas.2020589118), 2021-01-04
Supplement: pnas.2020589118.sapp.pdf [file pnas.2020589118.sapp.pdf]

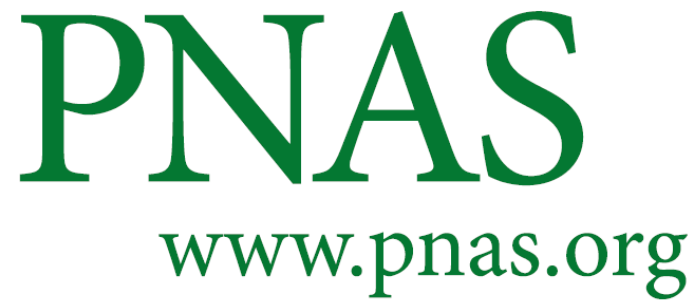

## **Supplementary Information for**

Hegemonic Masculinity Predicts 2016 and 2020 Voting and Candidate Evaluations

Theresa K. Vescio\* & Nathaniel E.C. Schermerhorn  
The Pennsylvania State University

\*Theresa K. Vescio  
Email: tkv1@psu.edu

### **This PDF file includes:**

Supplementary text  
Tables S1 to S5  
Interpretation of Interactions  
Figures S1 to S2  
SI References

## Supplementary Information Text

### Participants.

**Non-Student Samples.** In **Study 1**, 302 participants were recruited from Amazon Mechanical Turk in the days immediately following the election (November 10<sup>th</sup> – November 11<sup>th</sup>, 2016). After excluding participants who chose not to provide voting information ( $N = 3$ ), the working data set was comprised of the responses of 299 participants, including 141 cis-gender men, 151 cis-gender women, 4 transgender men, and 2 transgender women ( $M_{age}=39.12$  years,  $sd = 13.97$ ; 75.6 % White, 8.0% Black, 6.4% Asian, 7.4% Bi/Multiracial, 1.0% Other Non-White Identity).

In **Study 3**, 405 participants were recruited from Amazon's TurkPrime a year after the 2016 election (September 15<sup>th</sup> – October 18<sup>th</sup>, 2017). After excluding the responses of participants who did not provide voting information ( $N = 10$ ), who failed one or more attention checks ( $N = 28$ ), and who were queer/gender non-identified ( $N=3$ ), the working data set was comprised of the responses of 364 participants including 175 cis-gender men, 185 cis-gender women, 2 transgender men, and 1 transgender women. ( $M_{age} = 42.69$ ,  $sd = 13.45$ ; 83.5 % White, 6.1% Black, 4.1% Asian, 3.6% Bi/Multiracial, 2.8% Other Non-White Identity).

**Student Samples.** In **Study 2**, 289 undergraduate students were recruited from the psychology subject pool at the Pennsylvania State University in the week following the election (November 11<sup>th</sup> – November 16<sup>th</sup>, 2016). After excluding participants who did not provide voting information ( $N = 13$ ), the working data set was comprised of the responses of 276 participants, including 46 cis-gender men, 230 cis-gender women, 1 transgender man, and 1 transgender woman ( $M_{age}=18.64$  years,  $sd = .99$ ; 80.9 % White, 3.6% Black, 6.8% Asian, 2.2% Bi/Multiracial, 6.1% Other Non-White Identity).

In **Study 4**, 286 undergraduates were recruited from the psychology subject pool at Penn State approximately one month after the 2016 election (December 2<sup>nd</sup> – December 5<sup>th</sup>, 2016). After excluding the responses of students who did not provide voting information ( $N = 18$ ), the working data set was comprised of the responses of 268 participants including 55 cis-gender males, 212 cis-gender females, and 1 Transgender Female ( $M_{age} = 20.22$ ,  $sd = 5.69$ ; 75.7 % White, 7.9% Black, 10.5% Asian, 5.9% Other Non-White Identity).

In **Study 5**, 165 undergraduates were recruited from the psychology subject pool at Penn State approximately one month after the 2016 election (December 7<sup>th</sup> – December 9<sup>th</sup>, 2016). After excluding the responses of students who did not provide voting information ( $N = 11$ ), and who were queer/gender non-identified ( $N = 1$ ), the working data set then contained the responses of 153 participants including 39 cis-gender males, and 114 cis-gender females. ( $M_{age} = 18.93$ ,  $sd = 1.62$ ; 80.1 % White, 4.6% Black, 7.9% Asian, 7.3% Other Non-White Identity).

In **Study 6**, 406 undergraduates were recruited from the psychology subject pool at Penn State approximately a year after the 2016 election (November 29<sup>th</sup> – December 6<sup>th</sup>, 2017). After excluding the responses of participants who did not provide voting information ( $N = 26$ ), who failed one or more attention checks ( $N = 22$ ), and who were queer/gender non-identified ( $N = 1$ ), our working data set was comprised of the responses of 357 participants including 168 cis-gender males, 186 cis-gender females, 1 Transgender Male, and 2 Transgender Females ( $M_{age} = 19.13$ ,  $sd = 2.41$ ; 80.3% White, 3.1% Black, 10.1% Asian, 4.3% Bi/Multiracial, 2.2% Other Non-White Identity).

**Representative Sample.** In **Study 7**, 302 participants were recruited from Prolific 50 days before the 2020 Presidential election (September 14, 2020). After excluding participants who reported that they would not be voting in the 2020 election ( $N = 12$ ), the working data set was comprised of the responses of 290 participants. Using Prolific's built-in feature, we recruited a nationally representative sample of the U.S. population which included 146 cis-gender men, 142

cis-gender women, and 1 transgender male ( $M_{age} = 45.96$ ,  $sd = 15.71$ ; 70.6% White, 15.6% Black, 8.7% Asian, 2.4% Bi/Multiracial, 2.8% Other Non-White Identity).

## Measures.

**Hegemonic Masculinity.** In all seven studies, using a 7-point Likert scale (1 = strongly disagree, 7 = strongly agree), participants completed the 26 item Male Role Norms scale (MRNS; 1). The MRNS assesses beliefs that, to be a good man, one must be (1) high in power and status (e.g. “it is essential for a man to always have the respect and admiration of everyone who knows him”); (2) physically, emotionally, and mentally tough (e.g. “a good motto for a man would be ‘when the going gets tough, the tough get going’”); and (3) nothing like women (e.g. “it is a bit embarrassing for a man to have a job that is usually filled by a woman”). After reverse scoring appropriate items, we averaged across responses to create an endorsement of hegemonic masculinity (all  $\alpha$ s > .90); higher numbers reflected stronger endorsement of hegemonic masculinity.

**Precarious Masculine Identity.** In Studies 1 – 5 and Study 7, using a 5-point Likert scale (1 = not at all stressful, 5 = extremely stressful), participants completed the 40 item Male Gender Role Stress Scale (MGRS; 2). Participants rate the stress they imagine feeling at violating 5 elements of masculinity: (1) physical inadequacy (e.g. “losing in a sports competition”), (2) emotional inexpressiveness (e.g. “admitting that you are afraid of something”), (3) subordination (e.g. “being outperformed by a women at work”), (4) intellectual inferiority (e.g. “having to ask for directions when you are lost”), and (5) performance failure (e.g. “not making enough money”). After reverse scoring appropriate items, a single MGRS variable was created with higher numbers indicating greater precarious masculine identity (all  $\alpha$ s > .89)

**Political Identity and Voting.** Participants indicated their political party (1 = Democrat, 3 = Independent, 5 = Republican) and their political ideology (1 = very liberal, 5 = very conservative). For all analyses, the political party variable was used. Participants also indicated for whom they voted in the 2016 election. If participants did not vote, they instead indicated for whom they would have most likely voted. A dummy-coded variable was created to differentiate between participants who voted (or would have voted) for Trump (coded 1) and those who voted (or would have voted) for Clinton or another candidate (coded 0).

**Evaluations of Major Party Candidates.** Across studies, one of two scales was used to measure candidate evaluations. *In Studies 1, 2, 4, 5 and 7*, using 5-point scales (1 = far below average, 5 = far above average), participants evaluated each candidate on 12 dimensions. These include: (1) having overall presidential qualities, (2) qualified for the job, (3) honest, (4) ability to perform in war situations, (5) respectability, (6) willing to work the amount of hours needed, (7) ability to stand up to adversity, (8) control of national security, (9) good health, (10) willingness to fight ISIS, (11) ability to have control over any situation, and (12) intelligence. Evaluations of Trump and Clinton on these 12 dimensions were submitted to separate principle components factor analyses using a varimax rotations. In each of the four studies including Clinton, scree plots indicated a single factor solution, which accounted for more than 62.02% of the variance for evaluations Trump and more than 56.29% of the variance for evaluations Clinton. Therefore, we averaged across appropriate items to create an evaluation of Trump variable ( $\alpha$ s <sup>3</sup> .94) and an evaluation of Clinton variable ( $\alpha$ s > .93); higher numbers indicated more positive candidate evaluations. In Study 7, a single factor solution emerged for both Trump (accounting for 78.97% of the variance) and Biden (accounting for 78.16% of the variance). Again, we averaged across appropriate items to create an evaluation of Trump variable ( $\alpha$  = .97) and an evaluation of Biden variable ( $\alpha$  = .97). *In Studies 2 and 5*, participants completed the Leadership Trait Questionnaire (LTQ; 3); specifically, using 5-point scales (1 = strongly disagree, 5 = strongly agree) rated Trump and Clinton on 14 leadership traits (e.g. articulate, perceptive, self-confident). Again, parallel factor analyses revealed single factor solutions, which accounted for more than 50.94% of the variance in evaluations of Trump across studies and for more than 50.18% of the variance in evaluations of Clinton. Again, an evaluation of Trump variable ( $\alpha$ s > .92) and an evaluation of Clinton variable ( $\alpha$ s > .92) were created, with higher scores reflecting more positive evaluations.

**Trust in the Government.** In Studies 2 and 7, participants were asked to think back to the months leading up to the 2016 presidential election and indicate their trust in the government. Using items from the American National Election Studies (4), participants completed four items with either a 0 (no trust in government) or a 100 (complete trust in government). Participants reported how much of the time they thought they could trust the government to do what was right (100 = always, 0 = never), whether they felt the government was run by a few big interests looking out for themselves (0) or that it was run for the benefit of all (100), if they felt that people in the government wasted tax dollars (0 = wasted a lot of money, 100 = didn't waste very much of it), and if they felt the people who ran the government were crooked (0) or not at all crooked (100). We created an average score across the four items ( $\alpha > .72$ ) with higher scores reflect more trust in the government.

**Sexism.** In Study 3, participants completed the 22-item, Ambivalent Sexism Inventory (ASI; 5) using 7-point scales (1 = strongly disagree, 7 = strongly agree). We averaged across 11 subscale items (e.g. "A good woman should be put on a pedestal by her man") to create a benevolent sexism variable ( $\alpha = .80$ ) with higher numbers reflecting stronger beliefs that good women should be protected and cherished. We averaged across the remaining 11 items (e.g. "Women seek to gain power by getting control over men") to create a hostile sexism variable ( $\alpha = .87$ ) with higher numbers reflecting more hostility toward non-traditional women. In Study 7, participants completed the short, 12-item, version of the Ambivalent Sexism Inventory (6). Items still measured both benevolent (e.g. "Many women have a quality of purity that few men possess) and hostile (e.g. "Women exaggerate problems they have at work") sexism. We averaged across appropriate items to create both a benevolent sexism variable ( $\alpha = .85$ ) and a hostile sexism variable ( $\alpha = .90$ ).

**Racism.** In Studies 4 and 7, participants completed the Pro-Black and Anti-Black scale (7) using 7-point scales (1 = strongly disagree, 7 = strongly agree). We averaged across 10 subscale items (e.g. "Black people do not have the same employment opportunities that Whites do") to create a pro-black attitudes variable ( $\alpha > .84$ ) with higher numbers reflecting more sympathy toward Black Americans as victims of injustice. We averaged across the remaining 11 items (e.g. "One of the biggest problems for a lot of Blacks is their lack of self-respect") to create an anti-black variable ( $\alpha > .83$ ) with higher numbers reflecting antipathy toward Black Americans who are blamed for the relative lower social status of their racial group.

**Xenophobia and Homophobia.** In Studies 5 and 7, participants completed measures of xenophobia and homophobia, in random order. Participants, using a 7-point scale, (1 = strongly disagree, 7 = strongly agree) completed a xenophobia scale (8) reporting their fears about immigration (e.g. "interacting with immigrants makes me uneasy"). In addition, homophobia was assessed using the Homonegativity Scale (9); participants reported their attitudes toward gay men (e.g., "gay men should be avoided whenever possible") using 5-point scales<sup>1</sup> (1 = strongly disagree, 5 = strongly agree). After reverse scoring appropriate items, we averaged across items of a given scale to create a homophobia variable ( $\alpha > .93$ ) and a xenophobia variable ( $\alpha > .85$ ); higher numbers indicate more negative attitudes.

**Islamophobia.** In Study 7, participants completed the Islamophobia Scale (10). Using 7-point scales (1 = strongly disagree, 7 = strongly agree), participants completed 14 items assessing their attitudes toward Islam (e.g. "Islam is a dangerous religion") and Muslims (e.g. "If I could, I would avoid contact with Muslims"). We averaged across items to create an Islamophobia variable ( $\alpha = .98$ ); higher numbers indicate more negative attitudes.

---

<sup>1</sup> For consistency across all social attitudes, homophobia was measured using a 7-point scale (1 = strongly disagree, 7 = strongly agree) in Study 7.

**Table S1.** Results of hierarchical regression analyses for voting (binary logistic) and Trump evaluations (linear) for Studies 3 – 6

| Independent Variables                            | Study 3                    |                           | Study 4                    |                            | Study 5                   |                           | Study 6                   |                           |
|--------------------------------------------------|----------------------------|---------------------------|----------------------------|----------------------------|---------------------------|---------------------------|---------------------------|---------------------------|
|                                                  | Vote 2016 <sup>a</sup>     | Trump Eval                | Vote 2016 <sup>a</sup>     | Trump Eval                 | Vote 2016 <sup>a</sup>    | Trump Eval                | Vote 2016 <sup>a</sup>    | Trump Eval                |
|                                                  | OR                         | $\beta$                   | OR                         | $\beta$                    | OR                        | $\beta$                   | OR                        | $\beta$                   |
| <b>Step 1: R<sup>2</sup></b>                     | <b>.605<sup>***</sup></b>  | <b>.463<sup>***</sup></b> | <b>.604<sup>***</sup></b>  | <b>.495<sup>***</sup></b>  | <b>.647<sup>***</sup></b> | <b>.476<sup>***</sup></b> | <b>.481<sup>***</sup></b> | <b>.367<sup>***</sup></b> |
| Political Party                                  | 5.82 <sup>***</sup>        | .68 <sup>***</sup>        | 5.16 <sup>***</sup>        | .70 <sup>***</sup>         | 5.18 <sup>***</sup>       | .69 <sup>***</sup>        | 3.75 <sup>***</sup>       | .61 <sup>***</sup>        |
| <b>Step 2: <math>\Delta</math> R<sup>2</sup></b> | <b>.613</b>                | <b>.004</b>               | <b>.634<sup>*</sup></b>    | <b>.015<sup>.084</sup></b> | <b>.653</b>               | <b>.043<sup>*</sup></b>   | <b>.488</b>               | <b>.005</b>               |
| Political Party                                  | 5.79 <sup>***</sup>        | .67 <sup>***</sup>        | 5.52 <sup>***</sup>        | .68 <sup>***</sup>         | 5.01 <sup>***</sup>       | .64 <sup>***</sup>        | 3.71 <sup>***</sup>       | .59 <sup>***</sup>        |
| Gender                                           | 1.08                       | .02                       | .96                        | .09 <sup>.052</sup>        | .95                       | .19 <sup>**</sup>         | .91                       | .06                       |
| Race                                             | 1.40                       | .06                       | 1.37                       | .05                        | 1.39                      | .08                       | 1.16                      | .03                       |
| Education                                        | .66                        | -.03                      | .68 <sup>**</sup>          | -.09 <sup>.070</sup>       | .89                       | -.06                      | .87                       | .02                       |
| <b>Step 3: <math>\Delta</math> R<sup>2</sup></b> | <b>.636<sup>*</sup></b>    | <b>.037<sup>***</sup></b> | <b>.650<sup>.079</sup></b> | <b>.033<sup>***</sup></b>  | <b>.691<sup>*</sup></b>   | <b>.072<sup>***</sup></b> | <b>.523<sup>***</sup></b> | <b>.020<sup>**</sup></b>  |
| Political Party                                  | 5.38 <sup>***</sup>        | .60 <sup>***</sup>        | 5.09 <sup>***</sup>        | .62 <sup>***</sup>         | 5.72 <sup>***</sup>       | .59 <sup>***</sup>        | 3.48 <sup>***</sup>       | .54 <sup>***</sup>        |
| Gender                                           | .98                        | -.02                      | .78                        | .04                        | .59                       | .08                       | .68                       | -.01                      |
| Race                                             | 1.51 <sup>.076</sup>       | .07 <sup>.077</sup>       | 1.59 <sup>.097</sup>       | .07                        | 1.55                      | .08                       | 1.20                      | .04                       |
| Education                                        | .98                        | -.01                      | .67 <sup>**</sup>          | -.08 <sup>.081</sup>       | .87                       | -.07                      | .86                       | .02                       |
| PMI                                              | 1.28                       | -.04                      | .90                        | -.04                       | .39                       | -.01                      | -                         | -                         |
| HM                                               | 1.67 <sup>*</sup>          | .23 <sup>***</sup>        | 1.90 <sup>*</sup>          | .21 <sup>***</sup>         | 3.10 <sup>*</sup>         | .30 <sup>***</sup>        | 2.43 <sup>***</sup>       | .17 <sup>**</sup>         |
| <b>Step 4: <math>\Delta</math> R<sup>2</sup></b> | <b>.686<sup>.081</sup></b> | <b>.045<sup>*</sup></b>   | <b>.686</b>                | <b>.045<sup>.055</sup></b> | <b>.786</b>               | <b>.063</b>               | <b>.531</b>               | <b>.003</b>               |
| HM*PMI                                           |                            | -.12 <sup>*</sup>         |                            |                            |                           |                           |                           |                           |
| PMI*Gender                                       |                            |                           |                            | .18 <sup>*</sup>           | .01 <sup>*</sup>          |                           |                           |                           |
| HM*Race                                          | .21 <sup>*</sup>           |                           |                            |                            |                           |                           |                           |                           |
| HM*PMI*Ed                                        |                            | .12 <sup>*</sup>          |                            |                            |                           |                           |                           |                           |
| HM*Party                                         |                            | .17 <sup>***</sup>        |                            | .13 <sup>*</sup>           |                           |                           |                           |                           |
| PMI*Party                                        | .36 <sup>*</sup>           |                           |                            |                            |                           | -.17 <sup>*</sup>         |                           |                           |
| HM*PMI*Party                                     |                            |                           |                            |                            |                           | -.13 <sup>*</sup>         |                           |                           |

NOTE: PMI = Precarious Masculine Identity, HM = Hegemonic Masculinity

<sup>a</sup>Odds Ratio; R<sup>2</sup> values for binary logistic models refer to Nagelkerke R<sup>2</sup> associated with each step.

Interactions are discussed at the end of the supplemental materials.

\* $p < .05$ . \*\* $p < .01$ . \*\*\* $p < .001$ .

**Table S2.** Results of hierarchical regression analyses for voting (binary logistic) and candidate evaluations (linear) for Studies 1 & 7 separately for men and women

| Independent Variables          | Study 1                   |                |                     |                            |                     |                 | Study 7                   |                |                |                           |                |                |
|--------------------------------|---------------------------|----------------|---------------------|----------------------------|---------------------|-----------------|---------------------------|----------------|----------------|---------------------------|----------------|----------------|
|                                | Men                       |                |                     | Women                      |                     |                 | Men                       |                |                | Women                     |                |                |
|                                | Vote <sup>a</sup><br>2016 | Trump<br>Eval  | Clinton<br>Eval     | Vote <sup>a</sup><br>2016  | Trump<br>Eval       | Clinton<br>Eval | Vote <sup>a</sup><br>2020 | Trump<br>Eval  | Biden<br>Eval  | Vote <sup>a</sup><br>2020 | Trump<br>Eval  | Biden<br>Eval  |
|                                | OR                        | β              | β                   | OR                         | β                   | β               | OR                        | β              | β              | OR                        | β              | β              |
| <b>Step 1: R<sup>2</sup></b>   | <b>.583***</b>            | <b>.296***</b> | <b>.127***</b>      | <b>.612***</b>             | <b>.459***</b>      | <b>.276***</b>  | <b>.645***</b>            | <b>.465***</b> | <b>.310***</b> | <b>.713***</b>            | <b>.557***</b> | <b>.417***</b> |
| Political Party                | 5.14***                   | .54***         | -.36***             | 5.43***                    | .68***              | -.53***         | 6.13***                   | .68**          | -.56***        | 8.05***                   | .45***         | -.65***        |
| <b>Step 2: Δ R<sup>2</sup></b> | <b>.669**</b>             | <b>.015</b>    | <b>.030</b>         | <b>.629</b>                | <b>.005</b>         | <b>.017</b>     | <b>.654</b>               | <b>.027*</b>   | <b>.008</b>    | <b>.729</b>               | <b>.002</b>    | <b>.004</b>    |
| Political Party                | 5.83***                   | .52***         | -.32***             | 5.99***                    | .69***              | -.53***         | 6.32***                   | .69***         | -.55***        | 7.56***                   | .74***         | -.64***        |
| Gender                         | -                         | -              | -                   | -                          | -                   | -               | -                         | -              | -              | -                         | -              | -              |
| Race                           | 1.36                      | -.06           | -.06                | 1.05                       | .01                 | -.08            | 1.45                      | .13*           | -.09           | 2.01                      | .05            | .02            |
| Education                      | .47**                     | -.11           | .16 <sup>.069</sup> | .67                        | -.07                | .11             | .85                       | .08            | .04            | .84                       | .00            | .06            |
| <b>Step 3: Δ R<sup>2</sup></b> | <b>.691</b>               | <b>.084**</b>  | <b>.030</b>         | <b>.640</b>                | <b>.016</b>         | <b>.012</b>     | <b>.723**</b>             | <b>.071***</b> | <b>.011</b>    | <b>.740</b>               | <b>.054***</b> | <b>.005</b>    |
| Political Party                | 5.14***                   | .40***         | -.26**              | 5.58***                    | .65***              | -.54***         | 6.14***                   | .58***         | -.53***        | 6.54***                   | .62***         | -.62***        |
| Gender                         | -                         | -              | -                   | -                          | -                   | -               | -                         | -              | -              | -                         | -              | -              |
| Race                           | 1.51                      | -.02           | -.10                | 1.19                       | .03                 | -.06            | 1.69                      | .15**          | -.10           | 2.25                      | .09            | .01            |
| Education                      | .46**                     | -.10           | .16 <sup>.072</sup> | .69                        | -.06                | .10             | .81                       | .06            | .04            | .86                       | .00            | .07            |
| PMI                            | .95                       | .04            | .12                 | .79                        | .01                 | .12             | .49                       | .00            | .12            | 1.48                      | .05            | -.07           |
| HM                             | 2.21 <sup>.099</sup>      | .30**          | -.22*               | 1.72                       | .13 <sup>.080</sup> | -.06            | 5.29**                    | .29***         | -.12           | 1.58                      | .24***         | -.02           |
| <b>Step 4: Δ R<sup>2</sup></b> | <b>.796*</b>              | <b>.033</b>    | <b>.066</b>         | <b>.751<sup>.071</sup></b> | <b>.057</b>         | <b>.044</b>     | <b>.769</b>               | <b>.029</b>    | <b>.119**</b>  | <b>.818</b>               | <b>.066**</b>  | <b>.042</b>    |
| HM*Race                        |                           |                | -.34**              |                            |                     |                 |                           |                | -.24*          |                           |                |                |
| HM*PMI                         |                           |                | .51***              |                            |                     |                 |                           |                | .46***         |                           |                |                |
| PMI*Party                      |                           |                |                     |                            | -.21*               |                 |                           |                |                |                           | -.16*          |                |
| HM*PMI*Race                    |                           |                | -.35*               |                            |                     |                 |                           |                | -.48**         |                           |                |                |
| HM*PMI*Education               |                           | -.29*          |                     |                            |                     |                 |                           |                |                |                           | .16*           | .20*           |

NOTE: PMI = Precarious Masculine Identity, HM = Hegemonic Masculinity

<sup>a</sup> R<sup>2</sup> values for binary logistic models refer to Nagelkerke R<sup>2</sup> associated with each step.

\*p < .05. \*\*p < .01. \*\*\*p < .001.

**Table S3***Meta-analysis of correlations across all studies.*

|                           | <b>HM</b>                  | <b>PMI</b>               | <b>Gender</b>           | <b>Race</b>                | <b>Education</b>        | <b>Political Party</b>     | <b>Vote for Trump</b>      | <b>Trump Evaluations</b>   |
|---------------------------|----------------------------|--------------------------|-------------------------|----------------------------|-------------------------|----------------------------|----------------------------|----------------------------|
| HM                        | -                          | .412***<br>[.368, .454]  | .308***<br>[.267, .348] | -.055*<br>[-.099, -.010]   | .002<br>[-.043, .047]   | .305***<br>[.264, .345]    | .302***<br>[.259, .343]    | .366***<br>[.326, .404]    |
| PMI                       | -                          | -                        | .047<br>[-.004, .097]   | .004<br>[-.047, .055]      | .003<br>[-.048, .053]   | .137***<br>[.087, .186]    | .143***<br>[.091, .193]    | .174***<br>[.124, .224]    |
| Gender                    | -                          | -                        | -                       | .011<br>[-.033, .055]      | .047*<br>[.003, .091]   | .130***<br>[.086, .173]    | .143***<br>[.091, .193]    | .174***<br>[.124, .224]    |
| Race                      | -                          | -                        | -                       | -                          | .113***<br>[.069, .156] | .164***<br>[.121, .207]    | .173***<br>[.129, .217]    | .138***<br>[.094, .181]    |
| Education                 | -                          | -                        | -                       | -                          | -                       | .035<br>[-.009, .079]      | .173***<br>[.129, .217]    | .005<br>[-.040, .049]      |
| Political Party           | -                          | -                        | -                       | -                          | -                       | -                          | .603***<br>[.573, .631]    | .596***<br>[.567, .624]    |
| Vote                      | -                          | -                        | -                       | -                          | -                       | -                          | -                          | .676***<br>[.651, .700]    |
| Trust                     | -.047<br>[-.125, .032]     | -.061<br>[-.141, .020]   | .070<br>[-.073, .083]   | -.033<br>[-.111, .045]     | .061<br>[-.017, .138]   | -.169***<br>[-.244, -.092] | -.109**<br>[-.187, -.030]  | -.036<br>[-.114, .043]     |
| Benevolent                | .616***<br>[.560, .667]    | .346***<br>[.267, .420]  | .160***<br>[.076, .242] | -.128**<br>[-.211, -.044]  | -.069<br>[-.153, .017]  | .237***<br>[.155, .315]    | .267***<br>[.184, .345]    | .320***<br>[.241, .394]    |
| Hostile                   | .649***<br>[.596, .696]    | .370***<br>[.293, .442]  | .223***<br>[.141, .302] | .010<br>[-.075, .095]      | -.039<br>[-.123, .046]  | .436***<br>[.364, .502]    | .409***<br>[.334, .479]    | .483***<br>[.414, .546]    |
| Pro-Black                 | -.338***<br>[-.420, -.250] | -.104*<br>[-.199, -.007] | -.024<br>[-.119, .071]  | -.298***<br>[-.382, -.208] | -.016<br>[-.111, .080]  | -.596***<br>[-.654, -.531] | -.598***<br>[-.657, -.532] | -.647***<br>[-.700, -.588] |
| Anti-Black                | .560***<br>[.490, .623]    | .187**<br>[.092, .279]   | .214***<br>[.121, .303] | .074<br>[-.021, .169]      | -.042<br>[-.137, .053]  | .466***<br>[.388, .538]    | .466***<br>[.386, .539]    | .569***<br>[.501, .631]    |
| Homophobia                | .643***<br>[.594, .687]    | .268                     | .300***<br>[.226, .370] | -.005<br>[-.084, .074]     | -.021<br>[-.100, .057]  | .579***<br>[.524, .629]    | .542***<br>[.482, .596]    | .615***<br>[.563, .662]    |
| Xenophobia                | .510***<br>[.449, .566]    | .274                     | .141***<br>[.064, .217] | .192***<br>[.116, .267]    | .016<br>[-.063, .094]   | .521***<br>[.461, .576]    | .515***<br>[.454, .572]    | .515***<br>[.454, .572]    |
| Islamophobia <sup>a</sup> | .574***                    | .307***                  | .071                    | .132*                      | -.056                   | .473***                    | .552***                    | .621***                    |

NOTE: Values with a 95% confidence interval represent the mean *r* across all relevant studies. Values that do not have an associated 95% CI are correlations from a single study.<sup>a</sup>Correlations containing Islamophobia are from Study 7 only.\**p* < .05. \*\**p* < .01. \*\*\**p* < .001.

**Table S4.** Results of hierarchical regressions for voting for Trump (binary logistic) and evaluations of Trump (linear) including xenophobia and homophobia, Study 6

| Independent Variables                            | Xenophobia                 |                | Homophobia                 |                |
|--------------------------------------------------|----------------------------|----------------|----------------------------|----------------|
|                                                  | Vote <sup>a</sup><br>Trump | Trump<br>Eval  | Vote <sup>a</sup><br>Trump | Trump<br>Eval  |
|                                                  | Odds<br>Ratio              | $\beta$        | Odds<br>Ratio              | $\beta$        |
| <b>Step 1: R<sup>2</sup></b>                     | <b>.472***</b>             | <b>.366***</b> | <b>.483***</b>             | <b>.378***</b> |
| Political Identity                               | 3.67***                    | .61***         | 3.79***                    | .62***         |
| <b>Step 2: <math>\Delta</math> R<sup>2</sup></b> | <b>.481</b>                | <b>.005</b>    | <b>.492</b>                | <b>.005</b>    |
| Political Identity                               | 3.59***                    | .59***         | 3.73***                    | .60***         |
| Gender                                           | .92                        | .06            | .91                        | .07            |
| Race                                             | 1.27                       | .03            | 1.26                       | .03            |
| Education                                        | .88                        | .02            | .88                        | .02            |
| <b>Step 3: <math>\Delta</math> R<sup>2</sup></b> | <b>.520***</b>             | <b>.092***</b> | <b>.518**</b>              | <b>.056***</b> |
| Political Identity                               | 3.04***                    | .43***         | 3.02***                    | .44***         |
| Gender                                           | .86                        | .04            | .75 <sup>.086</sup>        | -.04           |
| Race                                             | 1.22                       | .00            | 1.41 <sup>.073</sup>       | .07            |
| Education                                        | .86                        | .01            | .88                        | .03            |
| Prejudice                                        | 1.80***                    | .35***         | 2.35**                     | .31***         |
| <b>Step 4: <math>\Delta</math> R<sup>2</sup></b> | <b>.536*</b>               | <b>.002</b>    | <b>.535**</b>              | <b>.002</b>    |
| Political Identity                               | 3.01***                    | .42***         | 3.14***                    | .44***         |
| Gender                                           | .70*                       | .02            | .64*                       | -.05           |
| Race                                             | 1.26                       | .00            | 1.42 <sup>.087</sup>       | .07            |
| Education                                        | .86                        | .01            | .88                        | .03            |
| Prejudice                                        | 1.62**                     | .33***         | 1.64                       | .28***         |
| PMI                                              | -                          | -              | -                          | -              |
| HM                                               | 1.89*                      | .06            | 2.06*                      | .06            |
| <b>Step 5: <math>\Delta</math> R<sup>2</sup></b> | <b>.547</b>                | <b>.006</b>    | <b>.547</b>                | <b>.004</b>    |

NOTE: PMI = Precarious Masculine Identity, HM = Hegemonic Masculinity

<sup>a</sup> R<sup>2</sup> values for binary logistic models refer to Nagelkerke R<sup>2</sup> associated with each step.

\*  $p < .05$ . \*\*  $p < .01$ . \*\*\*  $p < .001$ .



**Table S5.** Results of hierarchical regression analyses for evaluations of Clinton (Studies 1–6) and Biden (Study 7)

| Independent Variables                            | Study 1                   | Study 2                   | Study 3                   | Study 4                    | Study 5                    | Study 6                   | Study 7 (Biden)            |
|--------------------------------------------------|---------------------------|---------------------------|---------------------------|----------------------------|----------------------------|---------------------------|----------------------------|
|                                                  |                           |                           | $\beta$                   | $\beta$                    | $\beta$                    | $\beta$                   |                            |
| <b>Step 1: R<sup>2</sup></b>                     | <b>.203<sup>***</sup></b> | <b>.382<sup>***</sup></b> | <b>.407<sup>***</sup></b> | <b>.343<sup>***</sup></b>  | <b>.247<sup>***</sup></b>  | <b>.263<sup>***</sup></b> | <b>.356<sup>***</sup></b>  |
| Political Party                                  | -.45 <sup>***</sup>       | -.62 <sup>***</sup>       | -.64 <sup>***</sup>       | -.59 <sup>***</sup>        | -.50 <sup>***</sup>        | -.51 <sup>***</sup>       | -.60 <sup>***</sup>        |
| <b>Step 2: <math>\Delta</math> R<sup>2</sup></b> | <b>.018</b>               | <b>.031<sup>**</sup></b>  | <b>.019<sup>*</sup></b>   | <b>.024<sup>*</sup></b>    | <b>.024</b>                | <b>.038<sup>***</sup></b> | <b>.007</b>                |
| Political Party                                  | -.44 <sup>***</sup>       | -.61 <sup>***</sup>       | -.62 <sup>***</sup>       | -.58 <sup>***</sup>        | -.49 <sup>***</sup>        | -.49 <sup>***</sup>       | -.59 <sup>***</sup>        |
| Gender                                           | -.02                      | -.16 <sup>**</sup>        | -.12 <sup>**</sup>        | -.08                       | -.11                       | -.17 <sup>***</sup>       | .05                        |
| Race                                             | -.07                      | .03                       | .00                       | -.01                       | .03                        | .04                       | -.04                       |
| Education                                        | .11 <sup>.051</sup>       | .05                       | .08 <sup>.093</sup>       | .14 <sup>*</sup>           | .10                        | .09 <sup>.055</sup>       | .05                        |
| <b>Step 3: <math>\Delta</math> R<sup>2</sup></b> | <b>.014</b>               | <b>.003</b>               | <b>.023<sup>***</sup></b> | <b>.017<sup>.052</sup></b> | <b>.025</b>                | <b>.010<sup>*</sup></b>   | <b>.002</b>                |
| Political Party                                  | -.42 <sup>***</sup>       | -.61 <sup>***</sup>       | -.57 <sup>***</sup>       | -.54 <sup>***</sup>        | -.48 <sup>***</sup>        | -.45 <sup>***</sup>       | -.57 <sup>***</sup>        |
| Gender                                           | .01                       | -.17 <sup>**</sup>        | -.09 <sup>.056</sup>      | -.03                       | -.10                       | -.12 <sup>*</sup>         | .06                        |
| Race                                             | -.09                      | .03                       | -.02                      | -.03                       | .05                        | .04                       | -.05                       |
| Education                                        | .11 <sup>.055</sup>       | .05                       | .07                       | .13 <sup>*</sup>           | .10                        | .09 <sup>.061</sup>       | .05                        |
| PMI                                              | .12 <sup>.075</sup>       | -.06                      | -.03                      | .09                        | -.16 <sup>*</sup>          | -                         | .03                        |
| HM                                               | -.13 <sup>.077</sup>      | .04                       | -.15 <sup>**</sup>        | -.15 <sup>*</sup>          | -.04                       | -.12 <sup>*</sup>         | -.06                       |
| <b>Step 4: <math>\Delta</math> R<sup>2</sup></b> | <b>.047</b>               | <b>.036</b>               | <b>.022</b>               | <b>.019</b>                | <b>.119<sup>.066</sup></b> | <b>.005</b>               | <b>.050<sup>.051</sup></b> |
| HM*Race                                          |                           |                           |                           |                            |                            |                           | -.13 <sup>*</sup>          |
| PMI*Ed                                           |                           |                           |                           |                            | -.19 <sup>*</sup>          |                           |                            |
| HM*PMI*Race                                      |                           |                           |                           |                            |                            |                           | -.18 <sup>*</sup>          |

NOTE: PMI = Precarious Masculine Identity, HM = Hegemonic Masculinity

\* $p < .05$ . \*\* $p < .01$ . \*\*\* $p < .001$ .

## Interpretation of Interactions

Simple slope analyses (11) were conducted for all interactions if they emerged as significant in the final step of a regression model (a) that was associated with a significant  $\Delta R^2$ , or (b) in more than one study showing the effect on a given variable, if the  $\Delta R^2$  was not significant. All continuous variables were mean centered and references to high and low values refer to one standard deviation above and below the mean, respectively.

Interactions are presented by effect and in the order in which the analyses from which they emerge are discussed in the text.

### Hegemonic Masculinity (HM) x Race Interactions:

There were no consistent findings showing the moderation of HM effects by race. HM and Race interacted on evaluations of Trump in Studies 4 and 7 and on voting in Study 3 but were related with inconsistent findings. In Study 4, HM predicted more positive evaluations of Trump for non-White (but not White) participants. Findings from the nationally representative sample (Study 7) revealed the opposite: HM predicted more positive evaluations of Trump for White (but not non-White) participants. Effects are fully described below.

#### *On Evaluations of Trump (Studies 4 & 7)*

A significant HM x Race interaction emerged on evaluations of Trump in study 4, which was significant when sexism was included in the model [Table 4;  $t(195) = -2.35, p = .020$ ] and in Study 7 both when social attitudes were excluded from the model [Table 1;  $b = .35, t(194) = 3.06, p = .003$ ] and when Islamophobia was included in the model [Table 6;  $t(267) = 1.98, p = .049$ ].

In Study 4, increases in HM predicted more positive evaluations of Trump for non-White participants [ $b = .35, t(194) = 3.06, p = .003$ ] but not for White participants [ $p = .589$ ].

In Study 7, increases in HM predicted more positive evaluations of Trump for White participants [ $b = .42, t(267) = 5.26, p < .001$ ] but not non-White participants [ $p = .101$ ]. This effect was replicated when Islamophobia was included in the model: increases in HM predicted more positive evaluations of Trump for White participants [ $b = .42, t(267) = 5.26, p < .001$ ] but not non-White participants [ $p = .101$ ].

#### *On Voting for Trump (Study 3)*

A significant HM X Race interaction emerged on voting in Study 3. Regardless of whether trust in government (TIG) was excluded [Table S1, Wald = 4.59,  $p = .032$ ] or included [Table 3, Wald = 4.36,  $p = .037$ ], increases in HM predicted a greater likelihood of voting for Trump for:

non-White participants

TIG excluded [OR = 9.17, Wald = 3.76,  $p = .052$ ]

TIG included [OR = 9.17, Wald = 3.76,  $p = .052$ ]

but not for White participants [ $ps > .400$ ].

### Hegemonic Masculinity (HM) X Political Party Interactions:

HM and Political Party Affiliation interacted to influence evaluations of Trump, over and above Trust in Government (Study 3 and Study 7). Over and above Trust in Government, HM predicted more positive evaluations of Trump among respondents who were republican leaning, but possibly independents, but

not respondents who were democrats. There was also some evidence of a parallel effect over and above racism (Study 5), however, that effect did not similarly replicate in the representative national sample.

Below, we show the scale used to assess political party affiliation. We also show the means and standards on political party affiliation that emerged in each study in which there were significant HM X Political Party interactions.

As shown below, our samples were skewed toward Democrats, even in the nationally representative sample (Study 7). In addition, given the standard deviation used to create groups for comparison in simple slopes analyses, we performed simple slope analyses on respondents who were Democrats or Republican leaning.

***"Please indicate your personal affiliation"***

|       | Democrat | Democrat-Leaning | Independent | Republican-Leaning | Republican |
|-------|----------|------------------|-------------|--------------------|------------|
|       | 1        | 2                | 3           | 4                  | 5          |
| Study | Mean     | SD               |             | -1 SD              | +1 SD      |
| 3     | 2.60     | 1.348            |             | 1.252              | 3.948      |
| 5     | 2.78     | 1.367            |             | 1.413              | 4.147      |
| 7     | 2.81     | 1.469            |             | 1.341              | 4.279      |

***On Evaluations of Trump (Study 3, Study 5, and Study 7)***

In each Study, HM predicted more positive evaluations of Trump among:

Respondents who were Republican leaning

Study 3

Excluding Trust in Government [ $b = .42, t(280) = 4.50, p < .001$ ]

Including Trust in Government [ $b = .47, t(282) = 4.78, p < .001$ ]

Study 5

Including Racism [ $b = .57, t(105) = 3.24, p = .002$ ]

Study 7

Including Trust in Government [ $b = .38, t(268) = 4.80, p < .001$ ]

but not for respondents who were Democrats

Study 3

Excluding Trust in Government [ $p = .977$ ]

Including Trust in Government [ $p = .674$ ]

Study 5

Including Racism [ $p = .990$ ]

Study 7

Including Trust in Government [ $b = .16, t(268) = 1.81, p = .072$ ].

### Precarious Masculine Identity (PMI) X Gender Interactions:

PMI and Gender interacted on evaluations of Trump in Study 4 and on voting in Study 5 but provided no evidence of a reliable and expected PMI effect. On evaluations of Trump, the pattern among men was consistent with a precarious masculinity effect, though marginally significant, perhaps due to a small N. The opposite pattern emerged for women. However, these effects did not emerge as significant in any other study. In addition, on voting, the effects were opposite of precarious masculinity predictions. Effects are shown and fully described below

#### On Evaluations of Trump (Study 4)

A significant PMI X Gender interaction emerged on evaluations of Trump in Study 4, which was significant when sexism was excluded from the model (see Table S2),  $t(205) = 2.42, p = .016$ , and when sexism was included in the model (Table 4),  $t(195) = 2.66, p = .008$ .

When sexism is omitted from the analysis (Figure S1, left panel), PMI marginally predicted more positive evaluations of Trump for men [ $b = .51, t(205) = 1.82, p = .070$ ] but did not predict evaluations for women [ $p = .119$ ].

When sexism was included in the analysis (Figure S1, left panel), PMI again marginally predicted more positive evaluations of Trump for men [ $b = .39, t(194) = 1.75, p = .081$ ] and significantly predicted more negative evaluations of Trump for women [ $b = -.30, t(194) = -2.41, p = .017$ ].

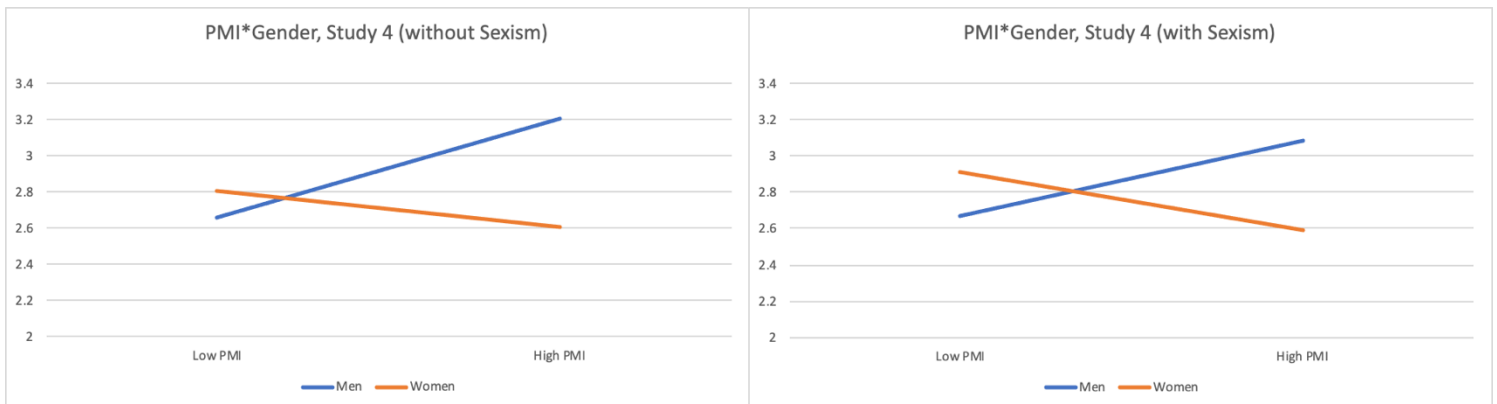

Fig. S1. Interaction of PMI x Gender in Study 4 without sexism (left) and with sexism (right) .

#### On Voting for Trump (Study 5)

A significant PMI X Gender interaction emerged on voting in Study 5, which was significant when racism was excluded from the model [Table S1, Wald = 3.89,  $p = .049$ ] and included in the model [Table 5, Wald = 4.07,  $p = .044$ ].

When racism omitted, PMI did not predict voting for either men or women [ $ps = .100$ ].

When racism was included, PMI predicting voting for men in a direction opposite to precarious masculine identity effect; PMI predicted less likelihood of voting for Trump for men [OR < .000, Wald = 4.26,  $p = .039$ ] and did not predict voting for women [ $p = .332$ ].

### Precarious Masculine Identity (PMI) X Hegemonic Masculinity (HM) Interactions:

PMI and HM interacted on evaluations of Trump in Study 3 (see Table S1 and Table 3). Increases in PMI predicted more positive evaluations of Trump for those who are low in HM, but not high in HM (see Figure S2).

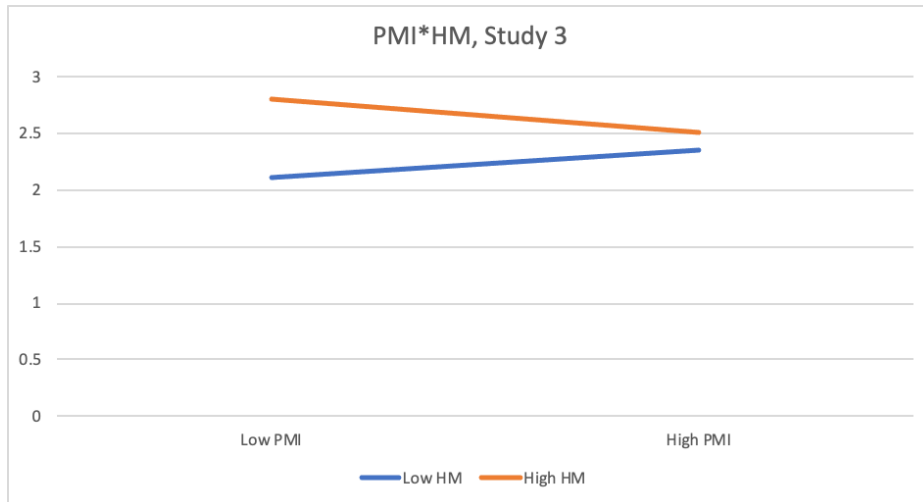

**Fig. S2.** Interaction of PMI x HM, Study 3

### ***On Evaluations of Trump (Study 3)***

A significant HM x PMI interaction emerged in Study 3, as shown in Figure S1 [ $t(280) = -2.02, p = .044$ ], and remained significant when including trust in the government in analyses, see Figure 3 [ $t(281) = -.14, p = .008$ ].

HM predicted more positive evaluations of Trump for those low in PMI  
Excluding Trust in government [ $b = .34, t(280) = 3.86, p < .001$ ]  
Including Trust in government [ $b = .38, t(281) = 4.43, p < .001$ ]

but HM did not predict Trump evaluations for those high in PMI [ $ps > .42$ ].

### ***The PMI X HM interaction was qualified by Education when omitting Trust in Government***

The pattern shown in Figure S2 held among people relatively low in education, but not high in education.

### **Precarious Masculine Identity (PMI) x Race Interaction:**

Contrary conceptualizations of PMI, PMI and Race interacted to influence voting in Study 5 when racism is included in the analysis (see Table 5), such that increases in PMI were unrelated to voting for Trump for White participants [OR < .000, Wald = 6.08,  $p = .014$ ] but PMI did not predict voting for non-White participants [ $p = .484$ ].

## **Additional Interactions Between Masculinity and Prejudice Attitudes, Study 7**

Similar patterns of findings emerged when including Xenophobia, Homophobia, and Islamophobia in the analyses on evaluations of Biden. For each type of prejudice, HM x Prejudice and PMI x Prejudice interactions emerged and were associated with significant  $\Delta R^2$  (see Table 7). We neither predict nor offer post hoc explanations for these effects. However, information is thoroughly presented for those with relevant interests. Simple slope analyses were performed first examining whether prejudice predicted evaluations for Biden for those low and high in HM. Then, analyses were performed to examine whether HM predicted evaluations for Biden for those low and high in prejudice.

### **HM x Xenophobia Interaction [ $t(267) = -2.99, p = .026$ ]**

Increases in Xenophobia predicted more negative evaluations of Biden for those high in HM [ $b = -.25, t(267) = -3.97, p < .001$ ] but not those low in HM [ $p = .571$ ].

Increases in HM predicted more positive evaluations of Biden for those low in Xenophobia [ $b = .245, t(267) = 2.38, p = .018$ ] and marginally more negative evaluations of Biden for those high in Xenophobia [ $b = -.20, t(267) = -1.84, p = .067$ ].

### **PMI x Xenophobia interaction [ $t(267) = 2.81, p = .005$ ]**

Increases in Xenophobia predicted more negative evaluations of Biden for those low in PMI [ $b = -.24, t(267) = -3.40, p = .001$ ] but not for those high in PMI [ $p = .624$ ].

Increases in PMI predicted more negative evaluations of Biden for those low in Xenophobia [ $b = -.41, t(267) = -2.45, p = .016$ ] and marginally more positive evaluations of Biden for those high in PMI [ $b = .31, t(267) = 1.72, p = .086$ ].

### **HM x Homophobia interaction [ $t(266) = -2.24, p = .026$ ]**

Increases in Homophobia predicted more negative evaluations of Biden for those high in HM [ $b = -.35, t(266) = -4.96, p < .001$ ] but not those low in HM [ $p = .292$ ].

Increases in HM predicted more positive evaluations of Biden for those low in Homophobia [ $b = .27, t(266) = 2.60, p = .010$ ] but not for those high in Homophobia [ $p = .556$ ].

### **PMI x Homophobia interaction [ $t(266) = 2.30, p = .022$ ]**

Increases in Homophobia predicted more negative evaluations of Biden for those low in PMI [ $b = -.36, t(266) = -4.31, p < .001$ ] but not for those high in PMI [ $p = .308$ ].

Increases in PMI predicted more negative evaluations of Biden for those low in Homophobia [ $b = -.37, t(266) = -3.76, p < .001$ ] but not for those high in Homophobia [ $p = .12$ ].

### **HM x Islamophobia interaction [ $t(266) = -3.43, p = .001$ ]**

Increases in Islamophobia predicted more negative evaluations of Biden for those high in HM [ $b = -.28, t(266) = -4.96, p < .001$ ] but not those low in HM [ $p = .632$ ].

Increases in HM predicted more positive evaluations of Biden for those low in Islamophobia [ $b = .30, t(266) = 2.95, p = .003$ ] and marginally more negative evaluations of Biden for those high in Islamophobia [ $b = -.19, t(266) = -1.78, p = .077$ ].

### **PMI x Islamophobia interaction [ $t(266) = 2.47, p = .014$ ]**

Increases in Islamophobia predicted more negative evaluations of Biden for those low in PMI [ $b = -.26, t(266) = -3.24, p = .001$ ] but not for those high in PMI [ $p = .806$ ].

Increases in PMI predicted more negative evaluations of Biden for those low in Islamophobia [ $b = -.33, t(266) = -2.04, p = .042$ ] but not for those high in Islamophobia [ $p = .170$ ].

## SI References

1. E. H. Thompson, J. H. Pleck, The structure of male role norms. *American Behavioral Scientist*, 29(5), 531-543 (1986).
2. R. M. Eisler, J. R. Skidmore, Masculine gender role stress: Scale development and component factors in the appraisal of stressful situations. *Behavior modification*, 11(2), 123-136 (1987).
3. P. G. Northouse, *Leadership: Theory and Practice (6<sup>th</sup> ed)*, (Sage Publishing, 2013).
4. American National Election Studies. (2012). *ANES Cumulative Data File* [Codebook, Variable VCF0656]. Retrieved from [http://anesold.isr.umich.edu/nesguide/toptable/tab5a\\_5.htm](http://anesold.isr.umich.edu/nesguide/toptable/tab5a_5.htm)
5. P. Glick, S. T. Fiske, The Ambivalent Sexism Inventory: Differentiating hostile and benevolent sexism, *Journal of personality and Social Psychology*, 70(3), 491-512 (1996).
6. C. Rollero, P. Glick, S. Tartaglia, Psychometric properties of short versions of the ambivalent sexism inventory and ambivalence toward men inventory, *TPM*, 21(2), 149-159 (2014).
7. I. Katz, R. G. Hass, Racial ambivalent and American value conflict: Correlational and priming studies of dual cognitive structures, *Journal of Personality and Social Psychology*, 55(6), 893-905 (1988).
8. K. Van der Veer, R. Ommundsen, O. Yakushko, L. Higler, S. Woelders, K. A. Hages, Psychometrically and qualitatively validating a cross-national cumulative measure of fear-based xenophobia, *Quality & Quantity*, 47(3), 1429-1444 (2013).
9. M. A. Morrison, T. G. Morrison, Development and validation of a scale measuring modern prejudice toward gay men and lesbian women, *Journal of Homosexuality*, 52(2), 15-37 (2002).
10. S. A. Lee, J. A. Gibbons, J. M. Thompson, H. S. Timani, The Islamophobia scale: Instrument development and initial validation, *The International Journal for the Psychology of Religion*, 19(2), 92-105 (2009).
11. L. S. Aiken, S. G. West, *Multiple Regression: Testing and Interpreting Interactions* (Sage, 1991).
